# Supplementary material
Source: MDPI journal article supplement (https://www.mdpi.com/2073-4395/13/5/1191)
Supplement: s1 [file s1]

Archive with 2 entries (2 files):
- agronomy-2298506-Supplementary Table S1-S4.xlsx
- Supplementary materials.pdf
