# Supplementary material
Source: MDPI journal article supplement (https://www.mdpi.com/2073-4395/13/5/1191)
Supplement: s1 [file s1 › agronomy-2298506-Supplementary Table S1-S4.xlsx]

## Sheet: Table S1
Table S1 | List of tomato samples with diverse traits.
ID	Tomato type	Growth type	Fruit color	ID	Tomato type	Growth type	Fruit color	ID	Tomato type	Growth type	Fruit color	ID	Tomato type	Growth type	Fruit color	ID	Tomato type	Growth type	Fruit color
L1	Large fruit	Indeterminate growth type	Pink	L44	Large fruit	Indeterminate growth type	Pink	L87	Large fruit	Determinate type	Pink	L130	Large fruit	Indeterminate growth type	Pink	L173	Roman	Indeterminate growth type	Orange-yellow
L2	Large fruit	Indeterminate growth type	Pink	L45	Large fruit	Indeterminate growth type	Pink	L88	Large fruit	Indeterminate growth type	Pink	L131	Large fruit	Indeterminate growth type	Pink	L174	Roman	Indeterminate growth type	Orange-yellow
L3	Large fruit	Determinate type	Pink	L46	Large fruit	Indeterminate growth type	Pink	L89	Large fruit	Determinate type	Pink	L132	Large fruit	Indeterminate growth type	Pink	L175	Cherry	Indeterminate growth type	Red
L4	Large fruit	Indeterminate growth type	Pink	L47	Large fruit	Indeterminate growth type	Pink	L90	Large fruit	Determinate type	Pink	L133	Large fruit	Indeterminate growth type	Pink	L176	Large fruit	Determinate type	Orange-yellow
L5	Large fruit	Indeterminate growth type	Pink	L48	Large fruit	Indeterminate growth type	Orange-yellow	L91	Large fruit	Indeterminate growth type	Pink	L134	Large fruit	Indeterminate growth type	Pink	L177	Cherry	Indeterminate growth type	Green
L6	Roman	Indeterminate growth type	Pink	L49	Large fruit	Indeterminate growth type	Orange-yellow	L92	Large fruit	Indeterminate growth type	Pink	L135	Large fruit	Indeterminate growth type	Pink	L178	Large fruit	Indeterminate growth type	Pink
L7	Large fruit	Indeterminate growth type	Pink	L50	Roman	Indeterminate growth type	Red	L93	Large fruit	Indeterminate growth type	Pink	L136	Large fruit	Indeterminate growth type	Pink	L179	Roman	Determinate type	Red
L8	Large fruit	Indeterminate growth type	Pink	L51	Roman	Indeterminate growth type	Red	L94	Large fruit	Indeterminate growth type	Pink	L137	Large fruit	Indeterminate growth type	Pink	L180	Large fruit	Indeterminate growth type	Purple
L9	Large fruit	Indeterminate growth type	Pink	L52	Large fruit	Indeterminate growth type	Orange-yellow	L95	Large fruit	Indeterminate growth type	Pink	L138	Large fruit	Indeterminate growth type	Pink	L181	Roman	Indeterminate growth type	Orange-yellow
L10	Large fruit	Indeterminate growth type	Pink	L53	Large fruit	Indeterminate growth type	Orange-yellow	L96	Large fruit	Indeterminate growth type	Pink	L139	Large fruit	Indeterminate growth type	Pink	L182	Large fruit	Indeterminate growth type	Pink
L11	Large fruit	Indeterminate growth type	Pink	L54	Large fruit	Indeterminate growth type	Pink	L97	Large fruit	Indeterminate growth type	Pink	L140	Large fruit	Indeterminate growth type	Pink	L183	Large fruit	Indeterminate growth type	Pink
L12	Large fruit	Indeterminate growth type	Pink	L55	Large fruit	Indeterminate growth type	Pink	L98	Large fruit	Indeterminate growth type	Pink	L141	Large fruit	Indeterminate growth type	Pink	L184	Large fruit	Indeterminate growth type	Pink
L13	Large fruit	Indeterminate growth type	Pink	L56	Large fruit	Indeterminate growth type	Pink	L99	Large fruit	Indeterminate growth type	Orange-yellow	L142	Large fruit	Indeterminate growth type	Pink	L185	Cherry	Indeterminate growth type	Orange-yellow
L14	Large fruit	Indeterminate growth type	Pink	L57	Large fruit	Indeterminate growth type	Pink	L100	Large fruit	Determinate type	Orange-yellow	L143	Large fruit	Indeterminate growth type	Pink	L186	Cherry	Indeterminate growth type	Orange-yellow
L15	Large fruit	Indeterminate growth type	Pink	L58	Large fruit	Indeterminate growth type	Pink	L101	Large fruit	Indeterminate growth type	Pink	L144	Large fruit	Indeterminate growth type	Pink	L187	Large fruit	Indeterminate growth type	Pink
L16	Large fruit	Indeterminate growth type	Orange-yellow	L59	Large fruit	Indeterminate growth type	Pink	L102	Large fruit	Indeterminate growth type	Orange-yellow	L145	Large fruit	Indeterminate growth type	Pink	L188	Cherry	Indeterminate growth type	Orange-yellow
L17	Large fruit	Indeterminate growth type	Pink	L60	Large fruit	Determinate type	Pink	L103	Large fruit	Indeterminate growth type	Pink	L146	Large fruit	Indeterminate growth type	Pink	L189	Large fruit	Indeterminate growth type	Pink
L18	Large fruit	Indeterminate growth type	Pink	L61	Large fruit	Indeterminate growth type	Pink	L104	Large fruit	Determinate type	Orange-yellow	L147	Large fruit	Indeterminate growth type	Pink	L190	Large fruit	Determinate type	Orange-yellow
L19	Large fruit	Indeterminate growth type	Orange-yellow	L62	Large fruit	Indeterminate growth type	Pink	L105	Large fruit	Determinate type	Orange-yellow	L148	Large fruit	Indeterminate growth type	Pink	L191	Large fruit	Indeterminate growth type	Orange-yellow
L20	Large fruit	Indeterminate growth type	Orange-yellow	L63	Large fruit	Indeterminate growth type	Pink	L106	Large fruit	Indeterminate growth type	Orange-yellow	L149	Large fruit	Indeterminate growth type	Pink	L192	Large fruit	Indeterminate growth type	Pink
L21	Large fruit	Indeterminate growth type	Orange-yellow	L64	Large fruit	Indeterminate growth type	Pink	L107	Large fruit	Indeterminate growth type	Pink	L150	Large fruit	Indeterminate growth type	Pink	L193	Large fruit	Indeterminate growth type	Pink
L22	Large fruit	Determinate type	Orange-yellow	L65	Large fruit	Indeterminate growth type	Pink	L108	Large fruit	Indeterminate growth type	Pink	L151	Large fruit	Indeterminate growth type	Pink	L194	Large fruit	Indeterminate growth type	Pink
L23	Large fruit	Determinate type	Orange-yellow	L66	Large fruit	Indeterminate growth type	Pink	L109	Large fruit	Indeterminate growth type	Pink	L152	Large fruit	Indeterminate growth type	Pink	L195	Large fruit	Indeterminate growth type	Pink
L24	Large fruit	Determinate type	Orange-yellow	L67	Large fruit	Indeterminate growth type	Pink	L110	Large fruit	Indeterminate growth type	Pink	L153	Large fruit	Indeterminate growth type	Yellowish	L196	Large fruit	Indeterminate growth type	Pink
L25	Large fruit	Determinate type	Orange-yellow	L68	Large fruit	Indeterminate growth type	Pink	L111	Large fruit	Indeterminate growth type	Pink	L154	Large fruit	Indeterminate growth type	Yellowish	L197	Large fruit	Determinate type	Pink
L26	Large fruit	Determinate type	Orange-yellow	L69	Large fruit	Indeterminate growth type	Pink	L112	Large fruit	Indeterminate growth type	Pink	L155	Large fruit	Indeterminate growth type	Yellowish	L198	Large fruit	Indeterminate growth type	Pink
L27	Large fruit	Determinate type	Orange-yellow	L70	Large fruit	Indeterminate growth type	Pink	L113	Large fruit	Indeterminate growth type	Pink	L156	Large fruit	Indeterminate growth type	Yellowish	L199	Large fruit	Indeterminate growth type	Pink
L28	Large fruit	Determinate type	Orange-yellow	L71	Large fruit	Indeterminate growth type	Pink	L114	Large fruit	Indeterminate growth type	Orange-yellow	L157	Large fruit	Indeterminate growth type	Yellowish	L200	Large fruit	Indeterminate growth type	Pink
L29	Large fruit	Determinate type	Orange-yellow	L72	Large fruit	Indeterminate growth type	Pink	L115	Large fruit	Indeterminate growth type	Orange-yellow	L158	Large fruit	Indeterminate growth type	Yellowish	L201	Large fruit	Indeterminate growth type	Yellowish
L30	Large fruit	Determinate type	Pink	L73	Large fruit	Indeterminate growth type	Pink	L116	Large fruit	Indeterminate growth type	Yellowish	L159	Large fruit	Indeterminate growth type	Pink	L202	Large fruit	Determinate type	Orange-yellow
L31	Large fruit	Determinate type	Pink	L74	Large fruit	Indeterminate growth type	Pink	L117	Large fruit	Indeterminate growth type	Orange-yellow	L160	Large fruit	Indeterminate growth type	Orange-yellow	L203	Cherry	Indeterminate growth type	Orange-yellow
L32	Large fruit	Indeterminate growth type	Pink	L75	Large fruit	Indeterminate growth type	Pink	L118	Large fruit	Indeterminate growth type	Pink	L161	Large fruit	Indeterminate growth type	Pink	L204	Large fruit	Indeterminate growth type	Yellowish
L33	Large fruit	Indeterminate growth type	Pink	L76	Cherry	Indeterminate growth type	Orange-yellow	L119	Large fruit	Indeterminate growth type	Orange-yellow	L162	Large fruit	Indeterminate growth type	Pink	L205	Large fruit	Indeterminate growth type	Yellowish
L34	Large fruit	Indeterminate growth type	Pink	L77	Large fruit	Indeterminate growth type	Pink	L120	Large fruit	Indeterminate growth type	Pink	L163	Large fruit	Indeterminate growth type	Pink	L206	Large fruit	Indeterminate growth type	Pink
L35	Large fruit	Indeterminate growth type	Pink	L78	Large fruit	Indeterminate growth type	Pink	L121	Large fruit	Indeterminate growth type	Pink	L164	Large fruit	Indeterminate growth type	Pink	L207	Large fruit	Indeterminate growth type	Pink
L36	Large fruit	Indeterminate growth type	Pink	L79	Large fruit	Indeterminate growth type	Pink	L122	Large fruit	Indeterminate growth type	Pink	L165	Large fruit	Indeterminate growth type	Yellowish	L208	Large fruit	Indeterminate growth type	Pink
L37	Large fruit	Indeterminate growth type	Pink	L80	Cherry	Indeterminate growth type	Pink	L123	Large fruit	Indeterminate growth type	Yellowish	L166	Large fruit	Indeterminate growth type	Yellowish	L209	Large fruit	Indeterminate growth type	Pink
L38	Large fruit	Indeterminate growth type	Yellowish	L81	Cherry	Indeterminate growth type	Pink	L124	Large fruit	Indeterminate growth type	Pink	L167	Large fruit	Indeterminate growth type	Pink	L210	Large fruit	Indeterminate growth type	Pink
L39	Large fruit	Indeterminate growth type	Pink	L82	Large fruit	Indeterminate growth type	Pink	L125	Large fruit	Indeterminate growth type	Orange-yellow	L168	Large fruit	Indeterminate growth type	Pink	L211	Large fruit	Indeterminate growth type	Pink
L40	Large fruit	Indeterminate growth type	Pink	L83	Cherry	Indeterminate growth type	Orange-yellow	L126	Large fruit	Indeterminate growth type	Orange-yellow	L169	Roman	Indeterminate growth type	Orange-yellow	L212	Large fruit	Determinate type	Orange-yellow
L41	Large fruit	Indeterminate growth type	Pink	L84	Large fruit	Indeterminate growth type	Pink	L127	Large fruit	Indeterminate growth type	Pink	L170	Cherry	Indeterminate growth type	Green
L42	Large fruit	Indeterminate growth type	Pink	L85	Large fruit	Determinate type	Pink	L128	Large fruit	Indeterminate growth type	Pink	L171	Cherry	Indeterminate growth type	Red
L43	Large fruit	Indeterminate growth type	Pink	L86	Large fruit	Indeterminate growth type	Pink	L129	Large fruit	Indeterminate growth type	Pink	L172	Roman	Indeterminate growth type	Red

## Sheet: Table S2
Table S2 | The resequencing depth and mapping rate of sample.
Sample ID	Coverage_rate(%)	Map_reads_rate(%)	Map_bases_rate(%)	Uni_hit_reads_rate(%)	Uni_hit_bases_rate(%)	Sequencing_depth	Effective_depth
L1	87.93	99.51	99.51	92.81	92.35	12.56	12.56
L2	89.67	99.66	99.66	93.48	93.16	12.18	12.18
L3	89.08	99.67	99.67	94.08	93.77	12.87	12.87
L4	87.65	99.46	99.46	93.3	92.79	11.08	11.08
L5	87.5	99.45	99.45	93.36	92.85	9.34	9.34
L6	87.91	99.53	99.53	93.6	93.16	11.67	11.67
L7	87.62	99.52	99.52	93.79	93.34	10.02	10.02
L8	87.65	99.47	99.47	92.07	91.59	12.68	12.68
L9	87.53	99.44	99.44	92.1	91.59	11.09	11.09
L10	87.03	99.31	99.31	92.89	92.25	11.1	11.1
L11	87.12	99.37	99.37	92.45	91.87	13.96	13.96
L12	86.92	99.34	99.34	92.72	92.11	9.77	9.77
L13	87.47	99.39	99.39	93.27	92.7	9.29	9.29
L14	87.22	99.35	99.35	92.38	91.77	11.72	11.72
L15	89.25	99.68	99.68	93.69	93.39	11.4	11.4
L16	88.02	99.52	99.52	92.96	92.52	12.71	12.71
L17	89.27	99.72	99.72	93.45	93.19	11.79	11.79
L18	87.51	99.44	99.44	91.95	91.44	11.42	11.42
L19	87.94	99.53	99.53	92.82	92.38	12.81	12.81
L20	87.88	99.56	99.56	92.95	92.53	11.53	11.53
L21	87.83	99.23	99.23	93.18	92.46	9.94	9.94
L22	89.6	99.66	99.66	93.93	93.61	10.4	10.4
L23	87.81	99.57	99.57	93.11	92.71	11.12	11.12
L24	87.9	99.51	99.51	92.97	92.51	12.75	12.75
L25	89.84	99.55	99.55	92.98	92.57	9.79	9.79
L26	89.62	99.49	99.49	94.15	93.67	9.78	9.78
L27	89.88	99.58	99.58	92.35	91.96	11	11
L28	89.85	99.56	99.56	92.99	92.58	9.98	9.98
L29	87.73	99.13	99.13	93.25	92.44	9.1	9.1
L30	89.63	99.48	99.48	93.2	92.71	10.36	10.36
L31	89.64	99.49	99.49	93.02	92.55	10.66	10.66
L32	87.61	99.09	99.09	92.36	91.52	12.44	12.44
L33	87.49	99.47	99.47	92.7	92.2	11.07	11.07
L34	89.28	99.72	99.72	92.83	92.57	11.79	11.79
L35	89.28	99.72	99.72	92.41	92.15	12.12	12.12
L36	87.58	99.45	99.45	93.42	92.91	10.62	10.62
L37	87.45	99.46	99.46	93.07	92.56	9.82	9.82
L38	88.04	99.52	99.52	92.54	92.09	11.22	11.22
L39	87.59	99.43	99.43	93.21	92.68	12.26	12.26
L40	89.37	99.62	99.62	92.65	92.29	14.81	14.81
L41	87.64	99.45	99.45	92.52	92.01	12.32	12.32
L42	87.61	99.47	99.47	93.17	92.68	11.32	11.32
L43	87.7	99.47	99.47	92.6	92.11	14.26	14.26
L44	88.11	99.35	99.35	92.81	92.21	10.4	10.4
L45	87.71	99.54	99.54	91.81	91.39	10.4	10.4
L46	87.87	99.51	99.51	92.6	92.15	10.62	10.62
L47	89.5	99.81	99.81	93.71	93.53	10.95	10.95
L48	87.94	99.56	99.56	92.94	92.53	12.48	12.48
L49	89.69	99.7	99.7	93.34	93.05	11.14	11.14
L50	87.95	99.54	99.54	90.81	90.39	12.47	12.47
L51	89.89	99.7	99.7	92.18	91.91	12.04	12.04
L52	87.94	99.57	99.57	90.97	90.58	13.75	13.75
L53	89.29	99.64	99.64	93.6	93.26	9.97	9.97
L54	87.39	99.48	99.48	91.98	91.5	9.03	9.03
L55	87.61	99.47	99.47	92.68	92.19	11.42	11.42
L56	87.56	99.47	99.47	92.55	92.06	11.17	11.17
L57	88.04	99.56	99.56	92.2	91.8	13.07	13.07
L58	87.9	99.56	99.56	92.05	91.65	11.37	11.37
L59	89.85	99.78	99.78	93.83	93.63	12.22	12.22
L60	89.81	99.64	99.64	91.86	91.53	13.7	13.7
L61	89.87	99.61	99.61	93.54	93.17	10.75	10.75
L62	89.5	99.79	99.79	94.44	94.25	10.27	10.27
L63	89.37	99.72	99.72	92.87	92.62	11.43	11.43
L64	89.55	99.64	99.64	93.45	93.11	10.53	10.53
L65	87.72	99.42	99.42	92.54	92	12.69	12.69
L66	87.39	99.45	99.45	92.57	92.06	9.66	9.66
L67	87.53	99.43	99.43	92.27	91.75	12.21	12.21
L68	87.53	99.43	99.43	92.41	91.88	11.58	11.58
L69	87.46	99.43	99.43	92.68	92.16	10.26	10.26
L70	87.38	99.41	99.41	92.66	92.11	9.47	9.47
L71	87.49	99.44	99.44	92.7	92.18	10.62	10.62
L72	89.3	99.73	99.73	93.96	93.71	11.42	11.42
L73	89.41	99.76	99.76	92.22	92	12.28	12.28
L74	89.37	99.75	99.75	92.11	91.88	11.22	11.22
L75	89.43	99.75	99.75	92.46	92.23	13.93	13.93
L76	87.25	99.42	99.42	90.45	89.93	12.85	12.85
L77	89.27	99.74	99.74	93.97	93.73	11.69	11.69
L78	89.06	99.72	99.72	93.99	93.73	10.2	10.2
L79	89.63	99.75	99.75	93.78	93.55	12.5	12.5
L80	87.09	99.39	99.39	92.68	92.11	13.36	13.36
L81	86.1	99.37	99.37	93.45	92.87	6.17	6.17
L82	89.3	99.69	99.69	93.13	92.85	12.31	12.31
L83	88.74	99.59	99.59	93.04	92.66	7.85	7.85
L84	87.41	99.53	99.53	93.41	92.97	7.14	7.14
L85	87.67	99.39	99.39	92.97	92.4	12.94	12.94
L86	89.22	99.72	99.72	92.85	92.59	13.05	13.05
L87	89.68	99.78	99.78	92.7	92.5	14.69	14.69
L88	89.3	99.7	99.7	92.81	92.53	12.33	12.33
L89	89.68	99.64	99.64	91.91	91.59	12.18	12.18
L90	89.59	99.79	99.79	92.64	92.44	9.72	9.72
L91	89.29	99.79	99.79	94.06	93.87	7.54	7.54
L92	89.27	99.77	99.77	92.83	92.62	7.6	7.6
L93	87.63	99.45	99.45	92.25	91.74	11.98	11.98
L94	87.59	99.46	99.46	91.74	91.24	11.26	11.26
L95	89.75	99.77	99.77	92.44	92.23	12.98	12.98
L96	89.7	99.83	99.83	93.25	93.08	12.63	12.63
L97	89.72	99.81	99.81	93.49	93.31	11.96	11.96
L98	87.62	99.42	99.42	91.96	91.42	11.77	11.77
L99	89.65	99.66	99.66	91.24	90.94	11.55	11.55
L100	89.4	99.66	99.66	90.95	90.64	8.62	8.62
L101	87.61	99.43	99.43	92.21	91.69	11.42	11.42
L102	86.45	99.28	99.28	91.19	90.54	9.68	9.68
L103	87.55	99.5	99.5	91.13	90.67	11.62	11.62
L104	87.6	99.48	99.48	91.62	91.14	11.6	11.6
L105	87.72	99.49	99.49	91.52	91.05	14.41	14.41
L106	87.76	99.5	99.5	92.5	92.04	13.94	13.94
L107	89.78	99.78	99.78	94.41	94.2	15.71	15.71
L108	87.53	99.46	99.46	92.55	92.05	10.8	10.8
L109	87.78	99.39	99.39	93.41	92.84	13.01	13.01
L110	87.13	99.41	99.41	92.73	92.18	8.45	8.45
L111	87.17	99.49	99.49	89.48	89.02	9.62	9.62
L112	87.92	99.55	99.55	92.77	92.35	11.06	11.06
L113	89.15	99.72	99.72	92.92	92.66	10.16	10.16
L114	87.44	99.43	99.43	92.3	91.77	12.25	12.25
L115	86.88	99.35	99.35	91.95	91.35	11.08	11.08
L116	88.24	99.51	99.51	93.22	92.76	11.78	11.78
L117	87.9	99.57	99.57	92.07	91.68	11.08	11.08
L118	89.48	99.73	99.73	93.86	93.61	11.48	11.48
L119	87.87	99.58	99.58	92.11	91.72	12.28	12.28
L120	89.31	99.73	99.73	94.22	93.97	11.21	11.21
L121	87.75	99.53	99.53	93.1	92.66	10.42	10.42
L122	87.98	99.54	99.54	91.96	91.54	14.27	14.27
L123	89.45	99.59	99.59	93.54	93.15	12.24	12.24
L124	89.72	99.83	99.83	92.24	92.09	12.47	12.47
L125	89.68	99.8	99.8	93.71	93.53	12.74	12.74
L126	89.3	99.65	99.65	93.79	93.45	10.35	10.35
L127	87.53	99.49	99.49	92.37	91.9	10.85	10.85
L128	89.68	99.85	99.85	91.65	91.51	12.13	12.13
L129	87.58	99.52	99.52	92.27	91.83	11.07	11.07
L130	89.7	99.81	99.81	92.31	92.14	13.15	13.15
L131	89.63	99.81	99.81	92.32	92.15	10.98	10.98
L132	87.81	99.59	99.59	90.77	90.4	12.39	12.39
L133	87.42	99.54	99.54	91.59	91.17	10.82	10.82
L134	87.53	99.5	99.5	93.14	92.68	10.08	10.08
L135	89.45	99.8	99.8	92.44	92.25	10.89	10.89
L136	87.61	99.45	99.45	92.1	91.6	12.17	12.17
L137	89.8	99.83	99.83	93.48	93.32	10.89	10.89
L138	89.82	99.83	99.83	92.71	92.55	11.77	11.77
L139	89.75	99.82	99.82	93.08	92.91	9.83	9.83
L140	89.88	99.82	99.82	92.97	92.8	11.94	11.94
L141	89.62	99.79	99.79	92.64	92.44	12.06	12.06
L142	87.54	99.36	99.36	92.16	91.57	10.35	10.35
L143	89.21	99.74	99.74	92.96	92.72	9.95	9.95
L144	89.85	99.81	99.81	93.69	93.51	11.37	11.37
L145	87.61	99.52	99.52	92.6	92.15	12.61	12.61
L146	89.7	99.85	99.85	90.99	90.86	13.17	13.17
L147	89.34	99.74	99.74	91.74	91.51	11.57	11.57
L148	86.74	99.39	99.39	89.05	88.51	11.23	11.23
L149	89.21	99.71	99.71	93.13	92.86	15.37	15.37
L150	87.9	99.55	99.55	92.13	91.72	10.9	10.9
L151	89.84	99.82	99.82	92.56	92.39	11.46	11.46
L152	89.79	99.82	99.82	92.03	91.87	10.99	10.99
L153	87.97	99.57	99.57	91.48	91.09	12.66	12.66
L154	87.98	99.45	99.45	91.48	90.98	11.24	11.24
L155	89.88	99.59	99.59	91.09	90.72	12.85	12.85
L156	87.94	99.58	99.58	91.41	91.02	11.78	11.78
L157	87.9	99.56	99.56	92.6	92.19	11.31	11.31
L158	87.91	99.56	99.56	92.6	92.19	10.85	10.85
L159	87.89	99.45	99.45	92.92	92.42	13.64	13.64
L160	87.69	99.54	99.54	92.55	92.13	10.92	10.92
L161	87.65	99.45	99.45	92.76	92.25	11.87	11.87
L162	87.59	99.48	99.48	91.23	90.75	12.17	12.17
L163	89.35	99.71	99.71	94.43	94.15	12.79	12.79
L164	87.72	99.58	99.58	90.57	90.19	11.6	11.6
L165	89.28	99.72	99.72	93.6	93.33	11.38	11.38
L166	89.27	99.75	99.75	92.94	92.7	11.74	11.74
L167	89.26	99.76	99.76	93.9	93.68	10.42	10.42
L168	87.93	99.56	99.56	91.17	90.77	11.41	11.41
L169	87.54	99.47	99.47	92.24	91.76	11.52	11.52
L170	87.26	99.5	99.5	92.28	91.82	8.77	8.77
L171	88.87	99.5	99.5	91.95	91.49	11.84	11.84
L172	86.89	99.3	99.3	91.58	90.93	11.84	11.84
L173	87.81	99.56	99.56	92.57	92.16	10.42	10.42
L174	87.9	99.57	99.57	91.5	91.11	12.42	12.42
L175	88.66	99.58	99.58	92.14	91.76	12.29	12.29
L176	89.64	99.84	99.84	94.19	94.04	11.05	11.05
L177	87.49	99.49	99.49	91.2	90.73	11.5	11.5
L178	87.14	99.43	99.43	93.15	92.62	7.38	7.38
L179	89.6	99.78	99.78	92.5	92.3	10.59	10.59
L180	87.89	99.48	99.48	93.23	92.74	12.37	12.37
L181	89.79	99.8	99.8	93.46	93.28	13.86	13.86
L182	86.58	99.26	99.26	91.7	91.02	10.8	10.8
L183	87.6	99.44	99.44	92.39	91.87	13.44	13.44
L184	87.57	99.43	99.43	92.95	92.43	11.58	11.58
L185	88.76	99.65	99.65	90.85	90.54	11.76	11.76
L186	89	99.55	99.55	90.69	90.28	9.89	9.89
L187	86.8	99.25	99.25	91.73	91.05	10.79	10.79
L188	88.68	99.65	99.65	91.28	90.96	10.39	10.39
L189	89.78	99.76	99.76	93.59	93.37	12.04	12.04
L190	89.62	99.77	99.77	93.65	93.43	11.17	11.17
L191	89.88	99.81	99.81	93.26	93.08	12.52	12.52
L192	89.81	99.81	99.81	91.02	90.84	11.48	11.48
L193	87.57	99.45	99.45	90.8	90.3	12.26	12.26
L194	87.44	99.48	99.48	91.57	91.09	10.16	10.16
L195	89.81	99.8	99.8	90.61	90.43	11.24	11.24
L196	87.61	99.53	99.53	92.42	91.99	8.22	8.22
L197	88.64	99.6	99.6	89.16	88.8	11.89	11.89
L198	88.54	99.56	99.56	91.35	90.95	12.06	12.06
L199	89.8	99.78	99.78	92.33	92.12	12.57	12.57
L200	87.87	99.51	99.51	92.1	91.64	10.82	10.82
L201	89.85	99.83	99.83	93.25	93.09	12.97	12.97
L202	89.32	99.78	99.78	93.97	93.76	12.29	12.29
L203	84.31	97.69	97.69	88.12	86.08	14.21	14.21
L204	89.76	99.81	99.81	92.92	92.75	11.95	11.95
L205	87.58	99.44	99.44	92.08	91.57	12.28	12.28
L206	87.68	99.47	99.47	92.89	92.4	13.17	13.17
L207	89.37	99.71	99.71	93.98	93.71	15.23	15.23
L208	89.26	99.59	99.59	93.16	92.77	12.03	12.03
L209	86.46	99.27	99.27	91.13	90.47	13.5	13.5
L210	89.29	99.62	99.62	90.96	90.62	11.91	11.91
L211	89.15	99.58	99.58	92.41	92.03	14.21	14.21
L212	88.01	99.56	99.56	91.89	91.48	11.62	11.62

## Sheet: Table S3
Table S3 | Data quality of clean data.
Sample ID	GC_rate(%)	Q20_rate(%)	Q30_rate(%)	Reads(M)	Bases(G)	Clean_Data/Raw_Data(%)
L1	36.31	97.64	91.79	103.97	10.4	95.85
L2	36.14	97.55	91.54	100.83	10.08	95.73
L3	35.74	97.8	92.23	106.59	10.66	95.78
L4	35.93	97.56	91.6	91.72	9.17	95.42
L5	35.94	97.19	90.54	77.34	7.73	95.67
L6	35.83	97.3	90.82	96.6	9.66	95.74
L7	35.67	97.61	91.69	82.99	8.3	95.84
L8	36.59	97.57	91.61	105.04	10.5	95.72
L9	36.69	96.87	90.14	91.82	9.18	95.33
L10	35.89	96.94	90.3	91.89	9.19	95.23
L11	35.98	97.35	91.42	115.56	11.56	95.46
L12	36.15	96.78	89.93	80.86	8.09	94.73
L13	36.08	96.15	88.23	76.96	7.7	94.94
L14	36.53	96.45	89.01	97.03	9.7	95
L15	36.12	96.94	90.31	94.41	9.44	95.35
L16	36.28	96.87	90.13	105.21	10.52	95.29
L17	36.11	97.64	91.8	97.61	9.76	95.87
L18	36.48	97.35	91.01	94.6	9.46	95.56
L19	36.2	97.62	91.77	106.1	10.61	95.67
L20	36.26	97.61	91.77	95.48	9.55	95.4
L21	36.23	97.25	90.73	82.34	8.23	95.59
L22	36	96.95	89.86	86.14	8.61	95.35
L23	36.27	97.76	92.15	92.1	9.21	95.84
L24	36.13	97.68	91.9	105.54	10.55	95.74
L25	36.05	95.42	87.86	81.01	8.1	92.68
L26	36.83	95.16	87.24	81.05	8.1	92.15
L27	37.11	95.44	87.97	91.07	9.11	92.58
L28	36.71	95.43	87.97	82.66	8.27	92.09
L29	36.06	95.21	87.35	75.38	7.54	92.63
L30	36.62	95.06	86.96	85.75	8.58	92.46
L31	36.59	95.59	88.33	88.26	8.83	92.85
L32	36.54	95.63	88.43	102.98	10.3	92.79
L33	36.36	98.11	92.76	91.64	9.16	95.92
L34	36.5	97.98	92.42	97.67	9.77	95.78
L35	36.78	98.05	92.65	100.38	10.04	95.8
L36	35.88	98.08	92.74	87.94	8.79	95.23
L37	36.19	97.7	91.54	81.35	8.13	95.65
L38	36.57	97.66	91.41	92.9	9.29	95.58
L39	36.01	98.23	93.14	101.56	10.16	95.94
L40	36.56	98.46	93.93	122.67	12.27	96.01
L41	36.28	98.32	93.39	102.01	10.2	95.95
L42	35.92	97.74	91.58	93.71	9.37	95.51
L43	36.15	98.17	92.91	118.1	11.81	95.86
L44	36.07	98.01	92.48	86.1	8.61	95.03
L45	36.83	97.77	91.74	86.13	8.61	95.67
L46	36.51	97.39	90.52	87.92	8.79	95.44
L47	36.36	97.94	92.21	90.66	9.07	95.78
L48	36.19	97.95	92.19	103.37	10.34	95.74
L49	36.26	97.97	92.27	92.28	9.23	95.45
L50	36.6	98.16	92.63	103.24	10.32	96.27
L51	36.71	98.21	93.12	99.73	9.97	95.32
L52	37.09	98.17	92.98	113.87	11.39	95.39
L53	35.86	97.86	92.01	82.52	8.25	94.83
L54	36.87	97.42	90.7	74.8	7.48	95.04
L55	36.38	97.7	91.48	94.59	9.46	95.17
L56	36.39	98.2	93.04	92.49	9.25	95.56
L57	36.56	98.08	92.65	108.19	10.82	95.5
L58	36.67	97.99	92.45	94.17	9.42	96.02
L59	36.08	97.9	92.17	101.21	10.12	95.74
L60	36.68	98.04	92.63	113.45	11.34	95.94
L61	36.02	97.91	92.23	88.99	8.9	95.39
L62	35.85	97.76	91.74	85.04	8.5	95.72
L63	36.59	97.38	90.61	94.62	9.46	95.65
L64	36.18	97.9	92.15	87.19	8.72	95.93
L65	36.32	97.92	92.19	105.08	10.51	95.89
L66	36.63	97.98	92.02	79.97	8	95.35
L67	36.58	98.09	92.42	101.07	10.11	95.29
L68	36.66	98.01	92.15	95.93	9.59	95.33
L69	36.49	97.96	92.05	84.95	8.5	94.87
L70	36.65	97.66	91.03	78.39	7.84	95.26
L71	36.52	97.67	91.01	87.9	8.79	95.34
L72	36.02	98.05	92.26	94.59	9.46	95.46
L73	37.14	97.86	91.69	101.69	10.17	95.31
L74	37.16	97.83	91.42	92.89	9.29	95.48
L75	36.66	98.07	92.21	115.33	11.53	95.53
L76	37.26	97.92	91.75	106.43	10.64	95.43
L77	36	97.99	91.95	96.8	9.68	95.09
L78	36.18	97.57	90.54	84.43	8.44	95.26
L79	36.17	97.8	91.26	103.53	10.35	95.48
L80	35.97	98.02	92	110.66	11.07	95.6
L81	34.8	98.1	92.66	51.08	5.11	96.05
L82	35.65	97.79	91.64	101.91	10.19	96.04
L83	36.25	97	90.38	64.97	6.5	92.59
L84	35.96	97.71	91.38	59.14	5.91	96.1
L85	35.73	97.75	91.46	107.17	10.72	96.23
L86	36.39	97.86	92.04	108.05	10.8	95.91
L87	36.05	98.15	92.79	121.6	12.16	96.28
L88	35.88	97.95	92.14	102.1	10.21	96.23
L89	35.85	97.98	91.98	100.83	10.08	96
L90	35.9	97.8	91.39	80.51	8.05	96.18
L91	35.51	97.53	91.25	62.41	6.24	92.72
L92	36.32	97.96	91.92	62.96	6.3	96.33
L93	35.73	98.11	92.35	99.24	9.92	96.22
L94	36.09	98.02	92.21	93.21	9.32	96.08
L95	35.93	98.2	92.64	107.53	10.75	96.33
L96	35.62	98.23	92.76	104.57	10.46	96.32
L97	35.39	98.15	92.58	99.02	9.9	95.93
L98	35.72	98.04	92.23	97.48	9.75	95.96
L99	36.55	98.15	92.74	95.66	9.57	95.6
L100	37.28	97.88	91.83	71.4	7.14	95.97
L101	36.18	97.99	92.07	94.56	9.46	96.04
L102	36.52	97.84	91.64	80.17	8.02	95.7
L103	36.36	98.11	92.46	96.18	9.62	96.1
L104	36.01	98.18	92.69	96.07	9.61	96.1
L105	36.01	98.32	93.09	119.29	11.93	96.37
L106	35.4	98.27	93	115.41	11.54	95.77
L107	35.28	98.49	93.78	130.06	13.01	96.44
L108	35.57	98.25	92.9	89.45	8.95	96.03
L109	35.28	98.51	93.84	107.7	10.77	96.51
L110	35.89	97.49	91.54	69.97	7	93.83
L111	38.66	97.97	92.12	79.63	7.96	95.44
L112	36.11	98.08	92.34	91.59	9.16	95.92
L113	36.47	97.86	91.85	84.11	8.41	95.57
L114	35.95	98.29	93.03	101.41	10.14	96.11
L115	35.8	98.34	93.19	91.79	9.18	96.03
L116	35.68	98.41	93.38	97.54	9.75	96.06
L117	36.38	98.37	93.26	91.73	9.17	96.22
L118	36	98.32	93.1	95.1	9.51	95.96
L119	37.1	98.49	93.71	101.72	10.17	96.12
L120	35.98	98.22	92.68	92.87	9.29	96.27
L121	36.14	98.28	92.93	86.29	8.63	96.1
L122	36.19	98.78	94.71	118.14	11.81	96.49
L123	35.63	98.65	94.2	101.33	10.13	96.38
L124	36.3	98.61	94.19	103.28	10.33	96.18
L125	35.63	98.7	94.41	105.51	10.55	96.44
L126	35.48	98.36	93.25	85.75	8.57	95.65
L127	36.7	98.38	93.28	89.89	8.99	96.25
L128	37.01	98.27	92.92	100.42	10.04	96.26
L129	36.27	98.38	93.29	91.63	9.16	96.32
L130	36.45	98.6	94.04	108.92	10.89	96.54
L131	36.41	98.53	93.8	90.94	9.09	96.39
L132	36.51	98.22	92.97	102.59	10.26	96.16
L133	36.39	98.21	92.88	89.6	8.96	96.14
L134	35.79	97.34	91.02	83.45	8.35	93.61
L135	36.81	97.99	92.15	90.18	9.02	96.16
L136	36.27	98.19	92.75	100.78	10.08	96.37
L137	36.27	98.02	92.31	90.19	9.02	96.16
L138	36.25	98.43	93.6	97.48	9.75	96.34
L139	36.15	98.14	92.6	81.39	8.14	96.33
L140	36.01	98.45	93.37	98.87	9.89	96.21
L141	36.16	98.61	93.98	99.88	9.99	96.34
L142	36.23	98.4	93.32	85.69	8.57	95.43
L143	36.93	98.24	92.63	82.37	8.24	96.15
L144	36.02	98.21	92.49	94.12	9.41	96.22
L145	36.15	98.61	93.96	104.39	10.44	96.13
L146	36.86	98.69	94.3	109.1	10.91	96.38
L147	36.67	98.52	93.67	95.82	9.58	96.28
L148	37.15	98.46	93.51	92.96	9.3	95.88
L149	35.94	98.59	94.15	127.29	12.73	96.59
L150	36.16	98.4	93.13	90.29	9.03	96.17
L151	36.46	98.46	93.48	94.9	9.49	95.86
L152	37.3	98.34	92.99	91.04	9.1	96.19
L153	36.85	98.45	93.34	104.87	10.49	96.33
L154	36.48	98.46	93.38	93.04	9.3	96.17
L155	36.53	98.66	94.1	106.41	10.64	96.46
L156	36.51	98.59	93.84	97.58	9.76	96.44
L157	35.8	98.55	93.7	93.68	9.37	96.2
L158	35.92	98.58	93.8	89.82	8.98	96.25
L159	35.74	98.42	93.51	112.98	11.3	95.44
L160	36.69	98.43	93.23	90.39	9.04	96.17
L161	36.55	98.27	93.06	98.3	9.83	96.28
L162	37.15	98.53	93.62	100.8	10.08	96.37
L163	35.46	98.37	93.36	105.92	10.59	96.54
L164	37.26	98.48	93.54	96.02	9.6	96.19
L165	36.23	98.27	93.11	94.24	9.42	95.93
L166	36.06	98.64	93.96	97.2	9.72	96.52
L167	35.55	98.57	93.71	86.28	8.63	96.42
L168	36.54	98.3	92.96	94.51	9.45	96.13
L169	35.96	98.36	93.05	95.38	9.54	96.36
L170	36.51	97.95	92.57	72.66	7.27	93.81
L171	36.64	98.31	92.91	98.01	9.8	96.36
L172	36.47	98.26	92.67	98.05	9.81	96.56
L173	36.47	98.18	92.5	86.29	8.63	96.32
L174	36.57	98.48	93.47	102.87	10.29	96.53
L175	36.27	98.43	93.31	101.77	10.18	96.49
L176	35.58	98.33	93.28	91.52	9.15	95.71
L177	36.59	98.19	92.82	95.22	9.52	95.97
L178	36.15	97.75	92.12	61.1	6.11	93.57
L179	37.32	97.95	92.04	87.71	8.77	96.06
L180	35.94	98.18	92.67	102.45	10.24	96.06
L181	36.1	98.68	94.53	114.76	11.48	96.55
L182	36.59	98.06	92.47	89.39	8.94	95.92
L183	35.85	98.43	93.59	111.27	11.13	96.11
L184	35.7	98.34	93.25	95.89	9.59	96.19
L185	36.88	98.14	92.61	97.38	9.74	96.25
L186	37.58	97.83	91.67	81.9	8.19	95.9
L187	36.4	97.97	92	89.36	8.94	96.13
L188	37.28	97.89	91.86	86	8.6	95.88
L189	35.94	98.48	93.7	99.68	9.97	96.33
L190	35.85	98.31	93.09	92.53	9.25	96.15
L191	35.86	98.27	93	103.65	10.36	95.84
L192	36.95	98.16	92.69	95.03	9.5	95.96
L193	36.17	98.15	92.48	101.53	10.15	96.21
L194	36.2	97.95	91.81	84.1	8.41	96
L195	36.66	98.14	92.51	93.06	9.31	96.28
L196	35.69	97.86	91.63	68.06	6.81	95.51
L197	36.94	98.16	92.6	98.42	9.84	96.19
L198	35.93	98.28	92.9	99.84	9.98	96.15
L199	35.41	98.15	92.47	104.09	10.41	96.12
L200	35.37	98.08	92.21	89.64	8.96	96.14
L201	36.4	98.28	93.14	107.41	10.74	96.06
L202	36.05	98.14	92.64	101.76	10.18	96.04
L203	36	98.39	93.49	117.64	11.76	96.08
L204	36.61	98.3	93.23	98.93	9.89	95.93
L205	36.33	98.48	93.84	101.7	10.17	96.12
L206	35.92	98.41	93.53	109.06	10.91	96.12
L207	35.51	98.36	93.36	126.14	12.61	95.97
L208	35.31	98.05	92.19	99.58	9.96	96.23
L209	36.13	98.06	92.23	111.77	11.18	96.3
L210	37.21	97.78	91.4	98.64	9.86	96.01
L211	35.98	98.02	92.1	117.67	11.77	96.32
L212	36.56	97.98	92.06	96.24	9.62	95.82

## Sheet: Table S4
Table S4 | Associated loci and candidate genes according to gene annotation.
Trait	Chr	Position	Locus name	Start	End	P-value (MLM)	Annotation	Know QTL	r2
Plant height	6	45853169-46853169	Solyc06g074350.3	46113204	46115474	6.44×10-11	self-pruning	Pnueli et al., 1998 a	0.235
-2			Solyc06g074670.3	46350099	46354335		UDP-apiose/xylose synthase		0.241
Fruit weight	2	47194175-48194175	Solyc02g083830.2	47645886	47647787	4.06×10-10	Pectinesterase		0.08
-15			Solyc02g083940.3	47733827	47741615		ubiquitin ligase complex subunit 1-like		0.077
			Solyc02g083950.3	47744436	47748006		wuschel	Munos et al., 2011a	0.055
			Solyc02g083980.3	47766094	47770710		Endoglucanase		0.055
			Solyc02g083990.3	47772357	47776713		polyamine-modulated factor 1-binding protein		0.058
			Solyc02g084005.1	47790194	47790553		SAUR-like auxin-responsive protein family		0.055
			Solyc02g084100.2	47846428	47852882		LOW QUALITY:Regulator of G-protein signaling 5		0.1
			Solyc02g084250.3	47961944	47973505		DNA mismatch repair protein mutL		0.08
			Solyc02g084265.1	47978080	47980379		Transducin family protein / WD-40 repeat family protein		0.055
			Solyc02g084280.3	47986489	47991852		Nuclear pore complex protein Nup98b		0.109
			Solyc02g084290.2	47995966	47997540		Protein kinase superfamily protein		0.13
			Solyc02g084315.1	48002978	48005670		embryo defective 2410		0.092
			Solyc02g084330.3	48005923	48007650		decapping 5-like protein		0.115
			Solyc02g084345.1	48019083	48024248		NAC domain-containing protein, putative		0.06
			Solyc02g084440.3	48088455	48090998		Fructose-bisphosphate aldolase		0.061
Green shoulder	10	1513127-2513127	Solyc10g007158.1	1603737	1604593	3.44×10-13	Transcription factor GTE4		0.252
-16			Solyc10g007170.2	1609301	1612585		Transcription factor GTE4-like protein		0.236
			Solyc10g007190.3	1614079	1620639		DAG protein		0.243
			Solyc10g007200.3	1621046	1626364		Hexosyltransferase		0.235
			Solyc10g007255.1	1659626	1663653		RELA/SPOT homolog 1		0.229
			Solyc10g007260.3	1663266	1668550		Ubiquitin-conjugating enzyme		0.245
			Solyc10g007290.3	1675685	1684543		Phosphoenolpyruvate carboxylase		0.218
			Solyc10g007900.3	2081035	2084816		Cytochrome P450		0.114
			Solyc10g008160.3	2280726	2285553		Two-component response regulator-like APRR2	Powell et al., 2012a	0.147
		1513127-2513127	Solyc10g008180.2	2289988	2303983	3.44×10-13	26S proteasome regulatory subunit		0.199
		(2104503-3104503)	Solyc10g008210.3	2314292	2322456	(1.43×10-11)	Targeting protein for Xklp2		0.197
			Solyc10g008245.1	2350223	2351555		basic helix-loop-helix (bHLH) DNA-binding superfamily protein		0.172
			Solyc10g008350.3	2473251	2474103		50S ribosomal protein L20, chloroplastic		0.171
		2104503-3104503	Solyc10g008390.3	2514289	2518792	1.43×10-11	Thioredoxin		0.178
			Solyc10g008400.2	2523186	2528910		RING/U-box superfamily protein		0.094
			Solyc10g008600.3	2679395	2682756		embryo defective 1923		0.089
Ventricle number	2	47485032-48485032	Solyc02g083940.3	47733827	47741615	1.66×10-10	ubiquitin ligase complex subunit 1-like		0.066
-11			Solyc02g083950.3	47744436	47748006		wuschel	Munos et al., 2011a	0.045
			Solyc02g084005.1	47790194	47790553		SAUR-like auxin-responsive protein family		0.045
			Solyc02g084090.2	47831920	47844921		ATP-dependent Clp protease ATP-binding subunit ClpX		0.053
			Solyc02g084100.2	47846428	47852882		LOW QUALITY:Regulator of G-protein signaling 5		0.088
			Solyc02g084200.2	47929187	47933849		Zinc finger transcription factor 19		0.075
			Solyc02g084250.3	47961944	47973505		DNA mismatch repair protein mutL		0.074
			Solyc02g084285.1	47989430	47994763		Nuclear pore complex protein		0.087
			Solyc02g084290.2	47995966	47997540		Protein kinase superfamily protein		0.127
			Solyc02g084315.1	48002978	48005670		embryo defective 2410		0.085
			Solyc02g084330.3	48005923	48007650		decapping 5-like protein		0.102
Soluble sugar content	1	93670222-94670222	Solyc01g106390.3	94199159	94201939	2.67×10-10	Glutamyl-tRNA reductase		0.152
-22			Solyc01g106420.3	94211296	94221343		Major facilitator superfamily protein		0.125
			Solyc01g106430.3	94221452	94225622		Inorganic pyrophosphatase		0.097
			Solyc01g106480.3	94254491	94258640		glyoxisomal malate dehydrogenase		0.125
			Solyc01g106680.3	94349300	94354133		Transmembrane protein, putative		0.14
			Solyc01g106770.3	94403820	94442655		Serine/threonine-protein kinase		0.096
			Solyc01g106780.3	94443840	94448625		Pyruvate kinase		0.13
			Solyc01g106940.3	94529409	94540017		Myb transcription factor		0.102
			Solyc01g107000.2	94575479	94587106		Endo-1,4-beta-xylanase C		0.115
			Solyc01g107080.3	94619460	94622992		HXXXD-type acyl-transferase family protein, putative		0.169
			Solyc01g107100.3	94627063	94627719		LOW QUALITY:beta-1,4-xylosidase		0.152
		95773188-96773188	Solyc01g109460.3	96321032	96324236	7.58×10-9	Polyol monosaccharide transporter 4		0.09
			Solyc01g109610.3	96423658	96427255		Erythronate-4-phosphate dehydrogenase family protein		0.078
			Solyc01g109790.3	96549062	96555534		ADP-glucose pyrophosphorylase large subunit 1	Petreikov et al., 2006a	0.08
	9	3667512-4667512	Solyc09g010820.3	4107732	4116142	7.76×10-9	MYB family protein		0.104
			Solyc09g010850.3	4169021	4172722		Protein kinase		0.116
	11	55092768-56092768	Solyc11g071790.2	55447875	55451164	4.18×10-9	Succinate dehydrogenase subunit 6, mitochondrial		0.106
			Solyc11g071810.2	55460282	55466987		fasciated	Cong et al., 2008a	0.103
			Solyc11g072060.2	55636079	55639154		MYB-related transcription factor		0.116
			Solyc11g072410.2	55869514	55879137		Adenylate kinase isoenzyme 6 homolog		0.116
			Solyc11g072500.2	55992049	55993935		Dof domain, zinc finger family protein		0.116
			Solyc11g072570.2	56032296	56040828		Major Facilitator Superfamily protein		0.084
Fruit hardness	5	3884919-4884919	Solyc05g009900.2	4125321	4126669	9.8×10-10	TCP transcription factor 25		0.09
-4			Solyc05g009930.3	4147174	4156369		Hydroxyproline-rich glycoprotein family protein		0.064
			Solyc05g009990.3	4190077	4192897		Leucine-rich repeat family protein		0.072
		4611452-5611452	Solyc05g011830.3	5061346	5066013	8.25×10-13	18S pre-ribosomal assembly protein gar2-like protein		0.118
Fruit shape	1	2390288-3390288	Solyc01g008890.3	2844633	2852040	3.72×10-10	Solanum lycopersicum Cytokinin Response Factor 3		0.125
-16			Solyc01g008977.1	2929533	2937486		BZIP transcription factor		0.131
	2	47451509-48451509	Solyc02g083950.3	47744436	47748006	1.56×10-12	wuschel	Munos et al., 2011a	0.026
			Solyc02g084280.3	47986489	47991852		Nuclear pore complex protein Nup98b		0.11
			Solyc02g084290.2	47995966	47997540		Protein kinase superfamily protein		0.177
			Solyc02g084315.1	48002978	48005670		embryo defective 2410		0.116
			Solyc02g084330.3	48005923	48007650		decapping 5-like protein		0.106
	3	61592567-62592567	Solyc03g098320.3	62098876	62103390	3.08×10-11	Myb transcription factor		0.378
			Solyc03g098325.1	62109014	62111623		Coiled-coil domain-containing 84		0.292
			Solyc03g098345.1	62116006	62120258		nucleoporin protein Ndc1-Nup protein		0.207
			Solyc03g098470.3	62189589	62193910		Small nuclear ribonucleoprotein family protein		0.261
			Solyc03g098500.3	62218292	62221379		Arf GTPase activating protein		0.263
	9	67183800-68183800	Solyc09g075540.1	67659304	67661426	1.26×10-9	Protein COBRA, putative		0.103
			Solyc09g075550.3	67665941	67670917		Cellulose synthase		0.13
			Solyc09g075580.1	67699546	67700031		LOW QUALITY:CheY-like two-component responsive regulator family protein		0.13
	11	24914107-25914107	Solyc11g032160.1	25794135	25794750	7.09×10-19	LOW QUALITY:Gamma-irradiation and mitomycin c induced 1, putative isoform 3		0.323
First ripening stage	1	85362723-86362723	Solyc01g094550.3	85850994	85863805	7.15×10-22	Acyl-CoA thioesterase, putative		0.661
-18	3	64163939-65163939	Solyc03g112960.1	64773909	64774736	2.97×10-22	LOW QUALITY:Pectinesterase		0.052
			Solyc03g113120.3	64872973	64877322		WRKY transcription factor 73		0.05
	5	63726376-64726376	Solyc05g053330.3	64297251	64299079	4.42×10-22	MYB transcription factor		0.071
	12	6513308-7513308	Solyc12g017360.2	6606925	6610490	7.06×10-22	Carbohydrate-binding X8 domain superfamily protein, putative		0.661
			Solyc12g017750.2	7358875	7359731		pentatricopeptide (PPR) repeat-containing protein		0.241
		16504519-17504519	Solyc12g082760.1	17331773	17332257	6.96×10-22	LOW QUALITY:Fasciclin-like arabinogalactan protein		0.146
		33697328-34697328	Solyc12g062690.2	34043350	34043904	7.12×10-22	transmembrane protein		0.258
			Solyc12g062700.1	34253314	34254645		LOW QUALITY:F-box-like/WD repeat-containing protein TBL1XR1		0.184
		47622820-48622820	Solyc12g036677.1	47741695	47742364	6.96×10-22	Cytochrome P450		0.088
		58307917-59307917	Solyc12g042700.2	58994943	58997663	7.09×10-22	tyrosine sulfotransferase-like protein		0.661
		60666133-61666133	Solyc12g044930.2	61224137	61225686	1.25×10-11	F-box family protein		0.475
			Solyc12g049080.2	61438508	61442371	5.86×10-22	LOW QUALITY:Unknown protein		0.278
			Solyc12g049100.2	61476318	61479182		WD40 repeat-like protein		0.662
			Solyc12g049160.1	61520922	61522049		Extensin-like protein Ext1		0.662
		61227125-62227125	Solyc12g049300.2	61724968	61727759	6.67×10-22	R2R3MYB transcription factor 54		0.662
			Solyc12g049510.2	62095003	62104623		ABC transporter B family member 19		0.357
			Solyc12g049540.2	62112839	62120115		Phosphoinositide phosphatase family protein		0.358
Gray leaf spot resistance	11	8435252-9435252	Solyc11g018590.1	8765168	8766380	4.15×10-10	LOW QUALITY:Subtilisin-like protease		0.166
-10			Solyc11g018660.2	8889531	8893993		NAC domain-containing protein, putative		0.17
			Solyc11g018710.1	9245468	9246061		LOW QUALITY:DUF688 family protein		0.045
		8435252-9435252	Solyc11g018740.2	9322219	9326897	4.15×10-10	Inner membrane OXA1-like protein		0.158
		(9207993-10207993)	Solyc11g018743.1	9331575	9339507	(9.82×10-10)	Membrane insertion protein, OxaA/YidC with tetratricopeptide repeat domain-containing protein	Su et al., 2018b	0.168
			Solyc11g018747.1	9350344	9361393		Inner membrane ALBINO3-like protein		0.108
		9207993-10207993	Solyc11g019930.2	9809891	9824176	9.82×10-10	RING/U-box superfamily protein		0.101
			Solyc11g020040.2	10036469	10040967		heat shock protein 70		0.097
			Solyc11g020080.2	10154490	10155240		Disease resistance protein		0.043
			Solyc11g020100.2	10156748	10161584		Disease resistance protein	Yang et al., 2022a	0.058
Note: a indicates the cloned QTL; b indicates the reported QTL.
